# Supplementary material for: Reduced Endocannabinoid Tone in Saliva of Chronic Orofacial Pain Patients
Source: MDPI journal article supplement (doi:10.3390/molecules27144662), 2022-07-21
Supplement: s1 [file s1]

**Table S1.** Pain group: Specific diagnosis, group diagnosis and medications.

| <b><u>Pain group</u></b> | <b><u>Drug</u></b>         | <b><u>Diagnosis</u></b> |
|--------------------------|----------------------------|-------------------------|
| Musculoskeletal          | n                          | MMP                     |
| Musculoskeletal          | Amitriptyline              | TMD                     |
| Musculoskeletal          | Amitriptyline              | MMP                     |
| Musculoskeletal          | n                          | TMD                     |
| Musculoskeletal          | Amitriptyline              | MMP                     |
| Musculoskeletal          | n                          | MMP                     |
| Musculoskeletal          | n                          | MMP                     |
| Musculoskeletal          | Nortriptyline              | MMP                     |
| Musculoskeletal          | n                          | MMP                     |
| Musculoskeletal          | n                          | TMJ                     |
| Musculoskeletal          | n                          | MMP                     |
| Musculoskeletal          | Duloxetine                 | TMD                     |
| Musculoskeletal          | n                          | TMD                     |
| Musculoskeletal          | n                          | TMD                     |
| Musculoskeletal          | Amitriptyline              | MMP                     |
| Musculoskeletal          | n                          | MMP                     |
| Musculoskeletal          | Amirtipityline             | MMP                     |
| Musculoskeletal          | Nortriptyline              | MMP                     |
| Musculoskeletal          | Amirtipityline             | MMP                     |
| Musculoskeletal          | Nortriptyline              | TMD                     |
| Musculoskeletal          | n                          | MMP                     |
| Musculoskeletal          | n                          | MIG                     |
| Musculoskeletal          | Amirtipityline             | MMP                     |
| Musculoskeletal          | Nortriptyline              | MMP                     |
| Musculoskeletal          | Amirtipityline             | MMP                     |
| Musculoskeletal          | Clonazepam                 | MMP                     |
| Musculoskeletal          | Nortriptyline              | MMP                     |
| Neuropathic              | Carbamazepine              | TN                      |
| Neuropathic              | Pregabalin, Carbamazepine  | TN                      |
| Neuropathic              | Pregabaline                | PTN                     |
| Neuropathic              | Pregabaline                | PTN                     |
| Neuropathic              | Duloxetine                 | PHN                     |
| Neuropathic              | Carbamazepine              | TN                      |
| Neuropathic              | Amirtipityline, Pregabalin | PTN                     |
| Neuropathic              | n                          | BMS, PTN                |
| Neuropathic              | Carbamazepine              | TN                      |
| Neuropathic              | Amirtipityline             | PTN                     |
| Neuropathic              | Amirtipityline             | PIFP                    |
| Neuropathic              | n                          | PHN                     |
| Neuropathic              | Duloxetine and more        | PTN                     |
| Neuropathic              | Pregabaline                | TN                      |
| Neuropathic              | Clonazepam                 | PTN BMS                 |
| Neuropathic              | n                          | BMS                     |
| Neuropathic              | n                          | BMS                     |
| Neuropathic              | n                          | TN                      |
| Neuropathic              | Pregabaline                | PIFP                    |
| Neuropathic              | Carbamzepine               | TN                      |
| Neuropathic              | Clonazepam                 | BMS                     |

|                |                            |               |
|----------------|----------------------------|---------------|
| Neuropathic    | Pregabalin                 | PTN           |
| Neuropathic    | Carbamazepine              | TN            |
| Neuropathic    | n                          | BMS           |
| Neuropathic    | Carbamazepine              | TN            |
| Neuropathic    | Nortriptyline              | PTN           |
| Neuropathic    | Clonazepam                 | BMS           |
| Neuropathic    | Pregabalin                 | PTN           |
| Neuropathic    | Carbamazepine              | TN            |
| Neurovascular  | Nortriptyline              | TTH           |
| Neurovascular  | Topiramte                  | MIG           |
| Neurovascular  | Topiramate, Amitriptyline  | MIG           |
| Neurovascular  | n                          | TTH           |
| Neurovascular  | n                          | TTH           |
| Neurovascular  | Nortriptyline              | MIG           |
| Neurovascular  | Topiramte                  | NVOP          |
| Neurovascular  | tripatans abortive         | MIG           |
| Neurovascular  | topamax                    | MIG           |
| Neurovascular  | Nortriptyline              | TTH           |
| Neurovascular  | Topiramat                  | NVOP          |
| Neurovascular  | Amirtipityline             | NVOP          |
| Neurovascular  | Nortriptyline              | TTH           |
| Neurovascular  | topamax 100 mg+rizalit     | NVOP          |
| Neurovascular  | Valproic acid              | MIG           |
| Neurovascular  | Triptans abortive          | MIG           |
| Neurovascular  | Amirtipityline             | NVOP          |
| Neurovascular  | Amirtipityline             | NVOP          |
| Neurovascular  | Amirtipityline, Pregabalin | MIG           |
| Neurovascular  | Pregabalin                 | MIG           |
| Neurovascular  | Topiramat                  | MIG           |
| Neurovascular  | multiple drugs             | MIG           |
| Neurovascular  | n                          | MIG           |
| Neurovascular  | Amitriptyline, Topitrimate | TTH MIG       |
| Neurovascular  | Topiramte                  | MIG PTN       |
| Neurovascular  | trigger point Injection    | MIG           |
| Neurovascular  | n                          | NVOP          |
| Neurovascular  | Topiramte                  | NVOP          |
| Neurovascular  | Nn                         | MIG, MMP      |
| Muscleskeletal | Nortriptyline              | A typical MMP |

n - none
